# Supplementary material for: Gut Transcription in Helicoverpa zea is Dynamically Altered in Response to Baculovirus Infection
Source: Insects. 2013 Sep 23;4(3):506–20. doi: 10.3390/insects4030506 (PMC4553479; doi:10.3390/insects4030506)
Supplement: Supplementary File 1 [file insects-04-00506-s001.xlsx]

## Sheet: Sheet1
Supplementary Table S1
Gene ontology/name		Fold change	Reference
Apoptosis-associated
	Apoptosis-linked protein 2	4.5	ABN09648.1
	Caspase short class	-1.97	XP_320581.3
	CG10641-PA	2.41	XP_624640.1
	Daxx-like protein	2.67	XP_973237.1
	Death related ced-3/Nedd2-like protein; Initiator caspase	-1.92	NP_001108337.1
	Death related ced-3/Nedd2-like protein; Initiator caspase	-1.65	NP_001108337.1
	Death related ced-3/Nedd2-like protein; Initiator caspase	-1.35	NP_001108337.1
	Death related ced-3/Nedd2-like protein; Initiator caspase	-1.24	NP_001108337.1
	Effector caspase; SI-caspase-1	-2.57	AAO16241.1
	Nit protein 1	2.22	XP_001605449.1
	Survivin	-1.86	XP_001662572.1
Cellular maintenance and signaling
	Acetylcholinesterase	1.79	AAV65638.1
	AGAP001281-PA	3.99	XP_321869.4
	AGAP002913-PA	-2.38	XP_973863.1
	AGAP004762-PA	-6.43	XP_318052.4
	AGAP007531-PA	-4.54	XP_974707.1
	AGAP009415-PA	-11.25	XP_559898.3
	AGAP009835-PA	5.31	XP_969354.2
	AGAP010229-PA	-5.22	XP_319417.2
	AGAP011453-PA	-2.98	XP_317850.4
	AGAP012383-PA	7.1	XP_970562.1
	Anaphase-promoting complex subunit CDC26, putative	3.1	EEC03468.1
	Antennal oxidioreductase	-6.68	AAR26515.1
	Arflike at 72A CG6025-PA	3.26	XP_001120141.1
	ATP-Binding cassette transporter	-5.7	XP_969849.1
	Beta-1,4-galactosyltransferase	1.87	XP_001603688.1
	cak1	3.27	XP_001657865.1
	Cell division protein kinase 5	5.1	XP_001841735.1
	CG13185 CG13185-PB	6.03	XP_972555.2
	CG14394 CG14394-PA	5.3	XP_972998.2
	CG33722 CG33722-PC	-1.51	XP_967570.1
	CG5009-PA	-7.15	XP_625136.1
	CG7029 CG7029-PC	2.27	XP_972733.1
	CG7442-PA	-3.68	XP_391853.2
	CG8199	-5.13	BAG30755.1
	Chemosensory protein	-2.45	AAF71291.1
	Citrate synthase	-5.32	XP_970124.1
	Citrate synthase	-5.21	XP_970124.1
	Cxpwmw03	-4.53	XP_969306.1
	Cytidylate kinase	-10.03	NP_001040356.1
	Cytochrome b	-3	ABQ85837.1
	Dihydrolipoamide branched chain transacylase E2	-5.26	XP_002188172.1
	Enhancer of rudimentary CG1871-PA, isoform A	4.36	XP_001119900.1
	ETHE1 protein, putative	-1.97	EEB20344.1
	F38B2.4	-5.48	XP_974095.1
	F-box only protein 22	-4.21	NP_001072897.1
	Fat body aminopeptidase	-4.33	ABN04204.1
	Follicular epithelum yolk protein subunit	3.42	AAD13187.1
	Futsch CG34387-PC	1.52	XP_972911.2
	GA12039-PA	-2.22	XP_001940971.1
	GA12051-PA	-4.31	XP_970467.1
	GA15778-PA	4.11	XP_968876.1
	GE10809	2.76	XP_002099252.1
	Gelsolin precursor	-5.1	XP_001657433.1
	GI4504	-3.47	XP_002001931.1
	GF16254	-16.08	XP_001955406.1
	GF16254	-10.95	XP_001955406.1
	GF16987	-4.72	XP_001953941.1
	GF16987	-2.62	XP_001953941.1
	GF21180	-2.97	XP_001963744.1
	GI12230	-5.1	XP_0020007773.1
	GI13300	3.41	XP_002008068.1
	GI13989	3.57	XP_002002167.1
	GI22321	-3.8	XP_002000807.1
	GI23457	4.19	XP_001998750.1
	GJ18795	-5.35	XP_002055427.1
	GK10225	3.35	XP_002071873.1
	GK11052	3.37	XP_002070394.1
	GK12172	-4.88	XP_00207635.1
	GK21272	-3.59	XP_002070635.1
	GL22257	-4.86	XP_002017330.1
	GM13322	-2.68	XP_002042372.1
	GM13322	-2.67	XP_002042372.1
	Hypothetical protein	-1.84	XP_001652498.1
	Hypothetical protein	1.64	XP_001600720.1
	Hypothetical protein	-6.8	XP_001659081.1
	Hypothetical protein	-2.7	XP_781522.2
	Inorganic phosphate cotransporter	-4.23	XP_001847126.1
	KIAA2010 protein	5.67	XP_002200590.1
	Luciferin-regenerating enzyme	-13.14	XP_967668.1
	Luciferin-regenerating enzyme	-6.12	XP_967668.1
	Luciferin-regenerating enzyme	-4.9	XP_967668.1
	Lysosomal-associated transmembrane protein	-4.26	NP_001037039.1
	Metaxin 2	-7.31	XP_974308.1
	Mitochondrial 2-oxoglutarate/malate carrier protein, putative	-3.9	EEB18634.1
	Mitochondrial carnitine/acylcarnitine translocase	-3.82	ACH82085.1
	Mitochondrial ribosomal protein, L53	-1.35	XP_001847583.1
	Myo-inositol-1 phosphate synthase	2.07	XP_001655997.1
	Myosin regulatory light chain interacting protein	-4.61	XP_975394.1
	Neuropeptide receptor B3	-5.87	NP_001127734.1
	Neuropeptide receptor B3	-5.37	NP_001127734.1
	Neuropeptide receptor B3	-3.74	NP_001127734.1
	Odorant receptor 16	6.53	NP_001104832.1
	Organic cation transporter	-4.88	XP_001867671.1
	Organic cation transporter	-3.12	XP_001867671.1
	Organic cation transporter	-2.65	XP_001867671.1
	Organic cation transporter	3.36	XP_001867671.1
	Oxysterol binding protein	2.54	XP_001811527.1
	Phosphatdiylinositol N-acetylglucosminyltransferase subunit H	2.86	NP_001134160.1
	Phosphate transport protein	-4.68	NP_001040482.1
	Phosphate transport protein	-4.59	NP_001040482.1
	Potassium-dependent sodium-calcium exchanger, putative	-4.12	XP_001649857.1
	Predicted protein	-4.97	EEB10909.1
	Predicted protein	2.24	XP_002157800.1
	Putative lysosomal glucocerebrosidase	-4.94	XP_001498700.1
	Putative lysosomal glucoserebrosidase	-11.65	XP_001498700.1
	PWWP domain-containing protein 2A	4.37	XP_001809305.1
	RE14504p	2.08	AAL48694.1
	RING finger protein 213, partial	3.41	XP_002169573.1
	Succinyl-coa-synthase beta chain	-3.98	XP_001651078.1
	Synaptic vesicle protein	-10.72	XP_001655861.1
	Synaptonemal complex protein 1	3.1	XP_001362435.1
	Tau CG31057-PA	-5.19	XP_974985.2
	Translocation associated membrane protein	-13.23	XP_001844990.1
	Transmembrane emp24 protein transport domain containing 9	6.38	NP_001040538.1
	Ubiquitin-protein ligase Ufd4, putative	1.69	XP_001258004.1
	Uncharacterized MFS-type transporter C19 ORF 28 homolog	5.52	XP_972510.2
	Unnamed protein product	-1.71	CAG01533.1
	Vacuolar ATP synthase subunit G	-4.6	NP_001040287.1
	Vacuolar protein sorting 25	6.62	XP_395839.1
	V-type proton ATPase 16 kDa proteolipid subunit	-4.7	P55277.1
	V-type proton ATPase 16 kDa proteolipid subunit	-4.28	P55277.1
	V-type proton ATPase catalytic subunit A	-5.33	P31400.1
	V-type proton ATPase subunit B	-6.79	P31410.1
	WD-repeat protein, putative	5.65	EEB14571.1
	XTP3-transactivated protein B	-2.75	XP_394479.3
Chitin Binding
	Chitin binding PM protein	-7.78	ABU98616.1
	Chitin binding PM protein	-7.29	ABU98616.1
	Chitin binding PM protein	-7.07	ABU98616.1
	Chitin binding PM protein	-6.72	ABU98616.1
	Chitin deacetylase	-11.24	ACB54935.1
	Chitin deacetylase	-9.57	ACB54935.1
	Chitin deacetylase	-9.54	ACB54935.1
	Chitin deacetylase	-9.2	ACB54935.1
	Chitin deacetylase	-9.18	ACB54935.1
	Chitin deacetylase	-9.17	ACB54935.1
	Chitin deacetylase	-8.67	ACB54935.1
	Chitin deacetylase	-8.37	ACB54935.1
	Chitin deacetylase	-5.02	ACB54935.1
	GK11459	-2.16	XP_002069652.1
	Insect intestinal mucin 3	-6.17	ACB54954.1
	Insect intestinal mucin 3	-4.35	ACB54954.1
Detoxification
	Alkaline phosphatase 1	-8.59	ACF40806.1
	Alkaline phosphatase 2	-14.26	ACF40807.1
	Antennal cytochrome P450 CYP9	-2.58	AAR26518.1
	Cytochrome P450	-16.09	NP_001104007.1
	Cytochrome P450	-14.26	AAR37015.1
	Cytochrome P450	-11.02	NP_001104007.1
	Cytochrome P450	-8.26	XP_0010604810.1
	Cytochrome P450	-7.57	AAY21920.1
	Cytochrome P450	-6.88	AAT08968.1
	Cytochrome P450	-6.82	XP_0010604810.1
	Cytochrome P450	-6.5	AAT08967.1
	Cytochrome P450	-6.32	BAD34476.1
	Cytochrome P450	-6.16	AAT08967.1
	Cytochrome P450	-4.29	AAT08963.1
	Cytochrome P450	-3.59	XP_0010604810.1
	Cytochrome P450 6B2	-9.73	ABE60885.1
	Cytochrome P450 6B2	-7.81	ABE60885.1
	Cytochrome P450 6B2	-4.84	ABE60885.1
	Cytochrome P450 CYP332A1	-5.95	NP_001108340.1
	Cytochrome P450 CYP332A1	-5.26	NP_001108340.1
	Cytochrome P450 CYP332A1	-5.21	NP_001108340.1
	Cytochrome P450 CYP4L4	-15.02	AAL48300.1
	Cytochrome P450 CYP4L4	-11.96	AAL48300.1
	Cytochrome P450 CYP4S1	-6.88	ABU88427.1
	Cytochrome P450 CYP4S4	-6.36	AAL48299.1
	Cytochrome P450 CYP6AB5	-23.23	ACN88551.1
	Cytochrome P450 monooxygenase	-5.41	NP_001104007.1
	Cytochrome P450 monooxygenase CYP321A1	3.89	AAM54724.1
	Cytochrome P450 monooxygenase CYP4M6	-6.89	AAM54722.1
	Cytochrome P450 monooxygenase CYP4M6	-6.64	AAM54722.1
	GA10313-PA	3.22	XP_001601512.1
	GI23351	-3.37	XP_001998934.1
	GI23351	-3.02	XP_001998934.1
	GI23351	-2.96	XP_001998934.1
	Glutathione S-transferase	-9.38	ABK29516.1
	Glutathione S-transferase	3.39	AAL23839.1
	Glutathione S-transferase 1	-8.69	P46430.1
	Glutathione S-transferase GSTX01	-11.14	ABU88426.1
	Hemolysin-type calcium-binding region	-9.33	YP_001866724.1
	Inosine triphosphate	3.07	NP_001040500.1
	Microsomal glutathione S-transferase	-2.69	XP_968617.1
	Microsomal glutathione s-transferase, putative	-5.65	EEB15330.1
	Peroxisomal N1-acetyl-spermine	-6.93	XP_001850121.1
	Peroxisomal N1-acetyl-spermine	-6.38	XP_001850121.1
Insect Digestion-related genes
	AGAP003501-PA	-11.11	XP_973013.2
	AGAP003501-PA	-12.38	XP_973013.2
	AGAP003501-PA	-11.53	XP_973013.2
	AGAP003501-PA	-12.34	XP_973013.2
	AGAP003501-PA	-13.5	XP_973187.1
	AGAP005662-PA	-6.52	AAX62028.1
	AGAP006576-PA	-6.99	XP_001662499.1
	AGAP007053-PA	-3.69	XP_308711.2
	AGAP011434-PA	-6.25	NP_001104822.1
	Alpha-amylase	-10.13	ABU98614. 1
	Alpha-amylase	-15.83	XP_001603060.1
	Alpha-amylase	-10.76	ABU98614.1
	Alpha-amylase	-9.76	ABU98614.1
	Alpha-amylase	-8.79	ABU98614.1
	Alpha-amylase	-8.69	ABU98614.1
	Alpha-amylase	-8.62	ABU98614.1
	Alpha-amylase	-7.51	ABU98614.1
	Alpha-amylase	-9.06	ABU98614.1
	Aminopeptidase N	-16.4	AAN04900.1
	Aminopeptidase N	-16.98	AAK85538.1
	Aminopeptidase N	-13.3	AAK85538.1
	Aminopeptidase N	-10.36	AAK85538.1
	Aminopeptidase N	-6.25	AAK85538.1
	Aminopeptidase N	-5.38	AAK85538.1
	Aminopeptidase N	-5.23	AAK85538.1
	Aminopeptidase N	-13.24	ACC68683.1
	aminopeptidase N	-9.3	ACC68683.1
	Aminopeptidase N	-4.5	ABR88248.1
	aminopeptidase N	-15.71	ACC68682.1
	Aminopeptidase N1	-13.68	AAQ57406.1
	Aminopeptidase N1	-12.8	AAR37334.1
	Aminopeptidase N1	-11.55	AAQ57405.1
	Aminopeptidase N1	-13.34	AAR20813.1
	Aminopeptidase N1	-15.56	AAS00451.1
	Aminopeptidase N1	-13.15	AAR20814.1
	Aminopeptidase N1	-15.95	AAQ57406.1
	Aminopeptidase N1	-12.66	AAS00451.1
	aminopeptidase N1	-13.95	AAL34109.1
	Aminopeptidase N1	-7.94	AAS00450.1
	aminopeptidase N1	-9.7	AAL34109.1
	Aminopeptidase N2	-4.64	AAX39864.1
	aminopeptidase N5	-4.32	ACB54941.1
	Astacin	-11.69	ACG69475.1
	Astacin	-7.96	ACG69475.1
	Astacin	-11.55	ACG69475.1
	Astacin	-10.74	ACG69475.1
	Astacin	-9.03	ACG69475.1
	Astacin	-7.97	ACG69475.1
	Astacin	-11.57	ACG69475.1
	Astacin	3.72	ACG69475.1
	Azurocidin-like precursor protein	-6.55	AAM46727.1
	Azurocidin-like precursor protein	-7.13	AAM46727.1
	Azurocidin-like precursor protein	-5.92	AAC36150.1
	Beta-glucosidase	-8.66	XP_972437.1
	Beta-glucosidase precursor	-9.38	AAC06039.1
	Beta-glucosidase precursor	-11.62	AAC06039.1
	Beta-glucosidase precursor	-8.08	AAC06039.1
	Beta-glucosidase precursor	-7.91	AAC06039.1
	Beta-glucosidase precursor	-6.37	AAC06039.1
	Beta-glucosidase precursor	-6.26	AAC06039.1
	Beta-glucosidase precursor	-5.44	AAC06039.1
	Beta-glucosidase precursor	-11.92	AAC06039.1
	Beta-glucosidase precursor	-10.69	AAC06039.1
	Bifunctional protein folD	-5.46	XP_001844773.1
	carboxlyesterase CarE-11	-5.65	NP_001116815.1
	carboxlyesterase CarE-11	-5.56	ACB54956.1
	Carboxylesterase	-12.33	ABE01157.2
	Carboxylesterase	-9.73	ABE01157.2
	Carboxylesterase	-2.15	NP_001040466.1
	Carboxylesterase	-3.02	ABQ42338.1
	Carboxylesterase 4 variant 2	4.75	ACF98321.1
	Carboxylesterase-6	-3.87	XP_554784.3
	Carboxypeptidase	-10.62	ABU98625.1
	Carboxypeptidase	-9.08	ABU98625.1
	Carboxypeptidase	-9.32	ABU98625.1
	Carboxypeptidase	-7.92	CAF25190.1
	Carboxypeptidase A	-8.57	1JQG
	Carboxypeptidase A	-8.82	1JQG
	Carboxypeptidase B precursor	-9.59	CAJ30028.1
	Carboxypeptidase B precursor	-8.79	CAJ30028.1
	Carboxypeptidase B precursor	-10.19	CAJ30028.1
	Carboxypeptidase B precursor	-7.01	CAJ30028.1
	Carboxypeptidase B precursor	-9.7	CAJ30028.1
	Carboxypeptidase B precursor	-6.75	CAJ30028.1
	Carboxypeptidase B precursor	-7.83	CAJ30028.1
	Carboxypeptidase inhibitor	-2.16	NP_001106745.1
	Carboxypeptidase precursor	-8.7	CAF25189.2
	cathepsin 1-like protease	-12.85	ACD40324.1
	cathepsin 1-like protease	-13.03	ACD40324.1
	cathepsin 1-like protease	-9.65	ACD40324.1
	cathepsin 1-like protease	-3	ACD40324.1
	cathepsin 1-like protease	-2.6	ACD40324.1
	chymotrypsin	-12.69	ACB54940.1
	chymotrypsin	-9.55	ACB54940.1
	chymotrypsin	-10.63	ACB54940.1
	chymotrypsin	-9.28	ACB54940.1
	chymotrypsin	-7.52	ACB54940.1
	Chymotrypsin-like	-10.58	AAV33657.1
	Chymotrypsin-like	-10.29	AAV33657.1
	Chymotrypsin-like protease	-7.65	CAA72952.1
	Chymotrypsin-like protease	-7.07	CAA72958.1
	Chymotrypsin-like protease	-11	CAA72951.1
	Chymotrypsin-like protease	-10.58	CAA72951.1
	Chymotrypsin-like protease	-5.63	CAA72958.1
	Chymotrypsin-like protease	-8.94	CAA72962.1
	Chymotrypsin-like protease	-6.62	CAA72959.1
	Chymotrypsin-like protease	-9.1	CAA72960.1
	Chymotrypsin-like protease	-7.32	CAA72960.1
	Chymotrypsin-like protease	-9.61	CAA72966.1
	Chymotrypsin-like protease	-6.27	AAC02216.1
	Chymotrypsin-like protease	-8.11	CAA72966.1
	Chymotrypsin-like protease	-9.73	CAA72952.1
	Chymotrypsin-like protease	-9.32	CAA72959.1
	Chymotrypsin-like protease	-8	CAA72963.1
	Chymotrypsin-like protease	-8.78	CAA72964.1
	Chymotrypsin-like protease	-5.43	CAA72964.1
	Chymotrypsin-like protease	-5.63	CAA72966.1
	Chymotrypsin-like protease	2.88	CAA72952.1
	Chymotrypsin-like protease	-5.88	CAA72963.1
	Chymotrypsin-like protease	-7.52	CAA72956.1
	Chymotrypsin-like protease C3	-8.86	ABR88233.1
	Chymotrypsin-like protease C3	-9.56	ABR88233.1
	Chymotrypsin-like protease C8	-8.15	ABR88238.1
	Chymotrypsin-like protease C8	-5.25	ABR88238.1
	Chymotrypsin-like protease C8	-10.14	ABR88238.1
	Chymotrypsin-like protease C8	-9.92	ABR88238.1
	Chymotrypsin-like protease C9	-9.37	ABR88239.1
	Chymotrypsin-like serine protease	-7.38	NP_001040430.1
	Chymotrypsin-like serine protease	-9.18	AAX62028.1
	Chymotrypsin-like serine protease	-12.02	XP_315683.2
	Chymotrypsin-like serine protease	-7.84	AAX62028.1
	Chymotrypsinogen	-9.35	AAF71518.1
	Chymotrypsinogen	-8.58	AAF71518.1
	Chymotrypsinogen	-7.33	AAF71519.1
	Chymotrypsinogen	-6.8	AAV33654.1
	Chymotrypsinogen	-6.35	AAV33654.1
	Chymotrypsinogen-like protein	-5.2	AAC36150.1
	Chymotrypsinogen-like protein	-5.19	AAM46727.1
	Chymotrypsinogen-like protein	-5.04	AAC36150.1
	Chymotrypsinogen-like protein	-4.85	AAC36150.1
	Coagulation factor-like protein 1	1.64	AAL31705.1
	Conserved hypothetical protein	4.51	EEB20051.1
	Dipeptidyl peptidase 4	-10.18	XP_001846968.1
	Diverged serine protease	-11.52	CAA72961.1
	Diverged serine protease	-6.63	CAA72965.1
	Diverged serine protease	-11.97	CAA72965.1
	Diverged serine protease	-11.15	CAA72965.1
	Diverged serine protease	-11.4	CAA72965.1
	ESANGP00000011247	-3.89	XP_001607215.1
	ESANGP00000013861	-4.17	XP_001608051.1
	ESANGP00000013861	-5.18	XP_001608051.1
	Esterase	2.9	ABH01081.1
	Esterase	-6.29	ABH01082.1
	Fat body aminopeptidase	-3.36	ABN04204.1
	fatty acid-binding protein 1	-7.2	ACB54948.1
	Frucostidase	5.27	ABU98615.1
	GF21607	-2.85	XP_001965079.1
	GH14757	1.64	XP_001984974.1
	GH18330	3.45	ACD40324.1
	GH28013	-4.12	XP_001985943.1
	GH28013	-10.85	XP_001985943.1
	GI14334	-7.28	XP_002011875.1
	GK17982	2.36	XP_002068817.1
	GK19266	6.78	XP_002062167.1
	GL27004	-12.4	XP_002026767.1
	GPI-anchored protein of unknown function, putative	5	CAX44107.1
	HMG176	-8.87	ABH10141.1
	Hydroxyacyl-coenzyme A dehydrogenase	-2.59	NP_001040132.1
	Hypothetical protein	3.89	XP_001652940.1
	Hypothetical protein	-3.55	XP_001653296.1
	inactive lipase	-7.28	ACB54946.1
	inactive lipase	-7.23	ACB54946.1
	inactive lipase	-5.95	ACB54946.1
	Inositol polyphosphate phosphatase	-1.94	XP_001605344.1
	Isochorismatase domain containing protein	-7.38	NP_001040541.1
	Isovaleryl coenzyme A dehydrogenase	-5.85	EEB10814.1
	Isovaleryl coenzyme A dehydrogenase	-6.27	NP_001129356.1
	Isovaleryl-CoA dehydrogenase, putative	-1.72	EEB13258.1
	Lactosylceramide 4-alpha-galactosyltransferase, putative	-2.52	EEB19812.1
	LD13710p	2.69	XP_001605544.1
	lipase	-10.24	ACB54943.1
	Lipase	-12.35	BAD22559.1
	lipase	-9.6	ACB54943.1
	lipase	-13.21	ACB54943.1
	lipase	-9.54	ACB54945.1
	lipase	-9.02	ACB54943.1
	lipase	-6	ACB54943.1
	lipase	-17.45	ACB54943.1
	lipase	-9.5	ACB54943.1
	Lipase 1 precursor	-13.79	XP_316604.4
	Lipase 1 precursor	-12.41	XP_001662499.1
	Lipase-like protein	-7.89	ABU98626.1
	Lipase-like protein	-6.02	ABU98626.1
	Methylenetetrahydrofolate dehydrogenase	-7.36	ABU98624.1
	Midgut aminopeptidase APN1	-18.89	AAN75693.1
	Midgut aminopeptidase N2	-5.24	AAP37951.1
	Midgut aminopeptidase N2	-4.51	AAP37951.1
	Midgut aminopeptidase N4	-9.99	AAP37950.1
	Midgut aminopeptidase N4	-12.57	AAP37950.1
	Midgut aminopeptidase N4	-12.18	AAP37950.1
	Midgut aminopeptidase N5	-6.85	AAW72993.1
	p260	2.39	NP_001037476.1
	pancreatic lipase 2	-9.69	ACD40324.1
	pancreatic lipase 2	-10.55	ACD37364.1
	pancreatic lipase 2	-14.04	ACD37364.1
	pancreatic lipase 2	-6.39	ACD37364.1
	Peroxisomal multifunctional enzyme type 2	-2.74	XP_001843060.1
	polycalin	-15.71	NP_001116815.1
	polycalin	-10	ACB54956.1
	polycalin	-8.54	ACB54951.1
	polycalin	-9.34	ACB54956.1
	polycalin	-4.29	ACB54951.1
	Predicted protein	-5.04	NP_001129356.1
	Protease	-7.88	XP_001649874.1
	Protease	-5.51	ABU98624.1
	Protease	-4.93	ABU98623.1
	Protease	-7.82	ABU98623.1
	Protease	-7.43	ABU98623.1
	Protease	-5.85	ABU98619.1
	Protease	-9.95	ABU98618.1
	Protease	-10.78	ABU98619.1
	Protease	-9.94	ABU98619.1
	Protease	-9.02	ABU98619.1
	Putative chymotrypsin	-8.19	ACI45399.1
	Putative secreted peptide 30	2.39	AAV91443.1
	Putative trypsin	-8.23	CAA72966.1
	Putative trypsin precursor Hz2	-7.46	AAF74749.1
	Putative trypsin precursor Hz28	-6.26	AAF74751.1
	RE08455p	3.35	XP_970328.1
	Serine protease	4.37	BAF43531.1
	Serine protease 3	-9.86	ABP96916.1
	Serine protease 3	-9.5	ABP96916.1
	Serine protease 4	-6.39	ABP96917.1
	Serine protease 4	-12.03	ABP96917.1
	Serine protease 4	-10.13	ABP96917.1
	Serine protease 6	-8.7	ABP96919.1
	Serine protease 6	-5.51	ABP96919.1
	thymus-specific serine protease	-10.57	XP_001868269.1
	Triglycerol lipase, pancreatic	2.84	ABU98614.1
	Trypsin	-10.66	P35045.1
	trypsin	-4.9	ACB54938.1
	trypsin	-5.22	ACB54938.1
	trypsin	-6.12	ACB54938.1
	Trypsin precursor Hz1	-9.58	AAF74744.1
	Trypsin precursor Hz11	-5.6	AAF74745. 1
	Trypsin precursor Hz42	-9.41	AAF74746.1
	Trypsin precursor Hz42	-9.04	AAF74746.1
	Trypsin precursor Hz8	-7.33	AAF74743.1
	Trypsin precursor HzT15	-5.86	AAF74742.1
	Trypsin T2a	-10.03	ABR88242.1
	Trypsin T4	-8.57	ABR88247.1
	Trypsin T5	-8.94	AAK85538.1
	Trypsin T5	-8.07	ABR88248.1
	Trypsin T5	-8.02	ABR88248.1
	Trypsin-like protease	-12.46	CAA72950.1
	Trypsin-like protease	-5.82	CAA72950.1
	Trypsin-like protease	-10.36	CAA72952.1
	Trypsin-like protease	-5.51	CAA72962.1
	Trypsin-like protease	-10.47	CAA72948.1
	Trypsin-like protease	-6.24	CAA72949.1
	Trypsin-like protease	-10.95	CAA72959.1
	Trypsin-like protease	-9.13	CAA72948.1
	Trypsin-like protease	-8.06	CAA72948.1
	Trypsin-like protease	-7.62	CAA72948.1
	Trypsin-like protease	-7.27	CAA72948.1
	Trypsin-like protease	-5.7	CAA72948.1
	Trypsin-like protease	-9.58	CAA72949.1
	Trypsin-like protease	-9.08	CAA72956.1
	Trypsin-like protein	-11.35	AAK81696.1
	Trypsin-like protein	-9.37	AAK81696.1
	Trypsin-like serine protease T26	-7.21	ACI45416.1
	Trypsinogen Y precursor	-9.83	ABK29465.1
	Trypsinogen Y precursor	-9.41	ABK29465.1
	Trypsinogen Y precursor	-6.76	ABK29465.1
	Trypsinogen Y precursor	-6.49	ABK29465.1
	Trypsinogen Y precursor	-6.31	ABK29465.1
	Tryptophan oxygenase	1.75	AAR24625.1
	Valacyclovir hydrolase	-4.67	XP_001842013.1
	Xaa-pro aminopeptidase	-10.6	ABU98625.1
	Xaa-pro aminopeptidase	-5.68	XP_001948381. 1
	xaa-pro dipeptidase pepd/pepq (e. coli)	-4.41	XP_001599533.1
	Zinc binding dehydrogenase	-3.03	XP_974428.1
	zinc carboxypeptidase A 1	-12.3	XP_001851495.1
	zinc carboxypeptidase A 1	-10.74	XP_001851495.1
	zinc carboxypeptidase A 1	-9.92	XP_001851495.1
	zinc carboxypeptidase A 1	-12.49	XP_001851495.1
	zinc carboxypeptidase A 1	-9.08	XP_001851495.1
	zinc carboxypeptidase A 1	-6.97	XP_001851495.1
	zinc carboxypeptidase A 1	-7.5	XP_001851495.1
Insect Growth
	Angiotensin converting enzyme	-5.32	ABW34729.1
	Arylphorin subunit	-10.46	CAB55605.1
	Arylphorin subunit	-8.75	CAB55605.1
	Arylphorin subunit	-6.11	CAB55605.1
	Basic juvenile hormone sensitive hemolymph protein2	1.86	AAA27883.1
	Cuticular protein CPFL4A	-2.5	BAG12759.1
	Cytochrome B5	-5.01	AAV84214.1
	Dehydroecdysone 3 alpha-reductase	3.09	AAF70499.1
	Ecdysteroid-inducible angiotensin-converting enzyme	-11.21	NP_001036859.1
	Ecdysteroid-regulated protein	-6.49	ABK29514.1
	Ecdysteroid-regulated protein	-6.3	ABK29514.1
	Fibrohexamerin (25 kDa silk glycoprotein)	4.47	P04148
	Fibrohexamerin (25 kDa silk glycoprotein)	2.28	P04148
	GK25686	-3.94	XP_002071245.1
	HMG176	-9.58	ABH10141.1
	HMG176	-9.46	ABH10141.1
	HMG176	-9.19	ABH10141.1
	Juvenile hormone epoxide hydrolase	-3.34	ABD85119.1
	Juvenile hormone epoxide hydrolase	-6	ABD85119.1
	Juvenile hormone-inducible protein, putative	-26.27	XP_001603343.1
	Putative cuticle protein	-2.88	FAA00482.1
	Putative cuticle protein	4.29	FAA00528.1
	Putative ecdysone oxidase	3.72	ACL36977.1
	Takeout/JHBP-protein	-5.97	ABP51960.1
	Twelve cysteine protein 1	3.22	AAL60414.1
	Unknown	-13.89	ABK22882.1
Insect Immunity
	Adhesion-like transmembrane protein	5.07	YP_313517.1
	AGAP008615-PA	3.58	XP_314711.4
	Alpha-platelet-derived growth factor receptor	3.81	EEB09955.1
	Antibacterial protein	-8.49	ACI02333.1
	Autophagy 5-like	2.28	NP_001135959.1
	azurocidin-like serine protease	-4.98	ACB54945.1
	azurocidin-like serine protease	-5.75	ACB54945.1
	azurocidin-like serine protease	-5.78	ACB54945.1
	azurocidin-like serine protease	5.46	XP_975168.1
	azurocidin-like serine protease azurocidin-like serine protease	-4.99	ACB54945.1
	Beta-1,3-glucanase	-14.4	ABU98621.1
	ESANGP00000018472	-4.53	XP_001603811.1
	HacD	2.49	AAX51193.1
	Hemolymph proteinase 9	-2.65	AAV91007.1
	Hemolymph proteinase 18	2.21	AAV91016.1
	Homologue of Sarcophaga 26, 29 kDa proteinase	-5.53	XP_001603755.1
	Hypothetical protein, partial	-2.97	XP_001202176.1
	Leukotriene A4 hydrolase	-3.65	NP_001040416.1
	Macrophage migration inhibitory factor	-11.45	NP_001040199.1
	Macrophage migration inhibitory factor	-9.43	NP_001040199.1
	Macrophage migration inhibitory factor	-9.31	NP_001040199.1
	M-like protein	2.61	CAB65413.1
	Peptidoglycan recognition protein B	-17.66	BAF03520.1
	Peptidoglycan recognition protein B	-16.12	BAF03520.1
	Peptidoglycan recognition protein B	-10.88	BAF03520.1
	Peptidoglycan recognition protein B	-7.51	BAF03520.1
	Prophenoloxidase subunit 2	4.41	AAZ52554.1
	Putative gram negative bacteria-binding protein	-19.55	ACB54952.1
	Putative gram negative bacteria-binding protein	-17.46	ACB54952.1
	Putative gram negative bacteria-binding protein	-17.34	ACB54952.1
	Putative gram negative bacteria-binding protein	-15.78	ACB54952.1
	Putative gram negative bacteria-binding protein	-15.77	ACB54952.1
	Putative gram negative bacteria-binding protein	-15	ACB54952.1
	Putative gram negative bacteria-binding protein	-14.18	ACB54952.1
	Putative gram negative bacteria-binding protein	-13.8	ACB54952.1
	Putative gram negative bacteria-binding protein	-11.88	ACB54952.1
	Surface antigen ariel1	5.66	XP_001914038.1
	Talin-2, putative	1.75	EEB19421.1
	Toll-interacting protein	1.66	XP_975168.1
Insect Metabolism
	2-hydroxyphytanoyl-CoA lyase	-7.38	NP_001040193.1
	3-2 trans-enoyl-CoA isomerase, putative	-4.68	XP_001649724.1
	3-hydroxy-3-methylglutaryl-CoA synthase	2.24	NP_001093297.1
	3-hydroxyacyl-CoA dehydrogenase	-5.12	NP_001040424.1
	3-hydroxyacyl-coa dehydrogenase	-4.62	XP_973042.1
	3-hydroxyacyl-coa dehydrogenase	-1.82	XP_001601340.1
	3-hydroxyacyl-coa dehydrogenase	-1.69	XP_001601340.1
	3-hydroxyisobutyrate dehydrogenase	-5.62	XP_002051970.1
	3-hydroxyisobutyrate dehydrogenase	-5.5	NP_001124349.1
	4-hydroxyphenylpyruvate dioxygenase	3.41	XP_001600932.1
	Acetoacetyl-CoA thiolase	-4.88	NP_001093296.1
	Acyl-CoA binding protein	-7.53	ABK29477.1
	Acyl-CoA desaturase HassGATD	5.95	AAM28480.2
	Acyl-CoA oxidase	-2.46	XP_973660.1
	acyl-CoA oxidase	-5.59	XP_001847631.1
	Acyl-CoA oxidase	-2.88	XP_973660.1
	Acyl-CoA-delta9-desaturase	2.2	ABX71628.1
	Acylphosphatase	3.52	XP_001808055.1
	AGAP000275-PA	-8.97	XP_310845.4
	AGAP000275-PA	-6.29	XP_310845.4
	AGAP001446-PA	-2.22	XP_551386.3
	AGAP001903-PA	-5.61	XP_321163.4
	AGAP002521-PA	4.06	XP_312416.3
	AGAP005662-PA	-1.79	XP_001952123.1
	AGAP005662-PA	-4.22	XP_315683.2
	AGAP005894-PA	-3.76	XP_969902.1
	AGAP006576-PA	2.96	XP_316604.4
	AGAP006821-PA	-5.85	XP_308924.2
	AGAP006821-PA	-5.47	XP_001950874.1
	AGAP009415-PA	-6.93	XP_55989.3
	AGAP009415-PA	-8.84	XP_559898.3
	Alcohol dehydrogenase	-10.92	NP_001040426.1
	Alcohol dehydrogenase	-8.74	NP_001040426.1
	Alcohol dehydrogenase	-6.84	NP_001040426.1
	Alcohol dehydrogenase	-4.7	NP_001040426.1
	Alcohol dehydrogenase	-4.3	NP_001040426.1
	Alcohol dehydrogenase	-3.97	NP_001040507.1
	Alcohol dehydrogenase	-4.91	XP_001603755.1
	Alcohol dehydrogenase	-3.58	XP_001605879.1
	Aldo-keto reductase	-3.61	XP_001648461.1
	AMP dependent coa ligase	-9.24	XP_001656463.1
	AMP dependent coa ligase	-6.35	XP_001656463.1
	AMP dependent coa ligase	-4.84	XP_001810985.1
	AMP dependent coa ligase	-3.16	XP_001656463.1
	AMP dependent coa ligase	-39.36	XP_001652383.1
	Arylalklamine N-acetyltransferase	-8.73	NP_001073122.1
	Arylalklamine N-acetyltransferase	-4.54	NP_001073122.1
	Asparagine synthetase	3.42	NP_001037414.1
	Asparagine synthetase	1.95	XP_001657834.1
	Aspartate aminotransferase	-5.21	NP_001040337.1
	Aspartate aminotransferase	-4.99	NP_001040337.1
	Aspartate aminotransferase	-4.33	NP_001040337.1
	CG1848-PA, isoform A	2.88	XP_393672.2
	CG3609	-6.65	NP_608675.1
	CG7470 CG7470-PA	2.94	XP_970358.2
	CG7675 CG7675-PB	-10.7	XP_971428.1
	Conserved hypothetical protein	-3.14	XP_001844628.1
	Diazepam-binding inhibitor	-5.33	AAR37334.1
	Diazepam-binding inhibitor	-5.29	AAR37334.1
	Diazepam-binding inhibitor	-5.28	AAR20813.1
	Diazepam-binding inhibitor	-4.86	AAR37334.1
	Diazepam-binding inhibitor	-5.58	AAR37334.1
	Diazepam-binding inhibitor	-4.96	AAR37334.1
	Dimeric dihydrodiol dehydrogenase	-3.09	XP_001607561.1
	Dimeric dihydrodiol dehydrogenase	-2.85	XP_001660494.1
	Endo- 1,4-beta-glucanase	-5.41	AAT97263.1
	Enoyl-CoA hydratase precursor 1	-8.11	ABD36107.1
	Enoyl-CoA hydratase precursor 1	-7.6	ABD36107.1
	Fumarylacetoacetate hydrolase	-6.31	NP_001103763.1
	Gamma-glutamyltranspeptidase 1	-4.87	XP_001846734.1
	Gamma-glutamyltranspeptidase 1	-2.73	XP_001844773.1
	GDP-L-fucose synthetase, putative	-2.95	EEB19363.1
	GF15278	-8.9	XP_001962064.1
	GF15278	-7.6	XP_001962064.1
	GG10914	-3.27	XP_001978967.1
	GI13181	-4.46	XP_002007878.1
	GJ11482	-5.21	XP_002048190.1
	GJ17291	3.83	NP_001124349.1
	GL25909	-11.8	XP_002018648.1
	GL25909	-6.18	XP_002018648.1
	Glucose dehydrogenase precursor, putative	-2.3	EEB16964.1
	Glucose dehydrogenase precursor, putative	-2.05	EEB16964.1
	Glucosidase	-9.26	NP_001037073.1
	Glucosidase	-9.04	NP_001037073.1
	Glutamate dehydrogenase	-5.84	NP_001040245.1
	Glutamate dehydrogenase	-5.7	NP_001040245.1
	Glutamate dehydrogenase	-5.42	NP_001040245.1
	Glutamate dehydrogenase	-4.92	NP_001040245.1
	Glutamate synthase	-8.02	NP_001041678.1
	Glycosyl hydrolase family 31 protein	-7.04	ABF71570.1
	Glycosyl hydrolase family 31 protein	-4.54	ABF71570.1
	Guanine deaminase	-4.61	XP_001656640.1
	Guanine deaminase	-6.03	XP_001656640.1
	Methylenetetrahydrofolate dehydrogenase	-7.88	XP_001654868.1
	NADH dehydrogenase-ubiquinone Fe-S protein 2 precursor	-8.19	NP_001040366.1
	NADH dehydrogenase-ubiquinone Fe-S protein 2 precursor	-3.79	NP_001040366.1
	NADP-dependent oxidioreductase	2.35	NP_001091765.1
	NADP-dependent oxidioreductase	-5.28	NP_001091765.1
	NADP-dependent oxidioreductase	-6.23	NP_001091765.1
	NADP-dependent oxidioreductase	-5.37	NP_001091765.1
	NADP-dependent oxidioreductase	-12.42	NP_001091765.1
	NADP-dependent oxidioreductase	-6.8	NP_001091765.1
	Pheromone-degrading enzyme 2	-4.63	AAX58712.1
	Proline synthetase co-transcribed bacterial-like protein	3.96	NP_001040304.1
	Propionyl-CoA carboxylase	-3.56	YP_756964.1
	Putative acetyl transferase	-4.92	BAH03386.1
	Putative acetyl transferase	-4.37	BAH03386.1
	Putative acetyl transferase	-2.47	BAH03386.1
	Putative aldo-keto reductase 2	4.14	CAW30925.1
	Ribose-phosphate pyrophosphokinase 1,2	-1.75	XP_974670.1
	Sb:cb283 protein	-20.16	XP_969358.1
	Serine hydroxymethyltransferase	-2.63	NP_001040279.1
	Sorbitol dehydrogenase	3.87	ABF51482.1
	Sterol carrier protein 2/3-oxoacyl-CoA thiolase	-7.22	AAT72922.1
	Tricoplusia ni secreted ferritin	-2.47	IZ6O_X
Categorized as miscellaneous function
	AGAP001277-PA	-5.61	XP_966844.1
Nucleic acid regulation
	5-methylthioadenosine phosphorylase	3.21	NP_001040514.1
	Acidic nucleoplasmic DNA-binding protein 1	4.22	NP_001136085.1
	AGAP002638-PA	1.51	XP_312290.4
	AGAP012074-PA	2.45	XP_552131.1
	Alpha (1,3) fucosyltransferase	4.12	XP_001660128.1
	Alpha-fetoprotein enhancer-binding protein	-2.79	XP_393785.3
	Apyrase	-8.72	XP_001848684.1
	Bip2 CG2009-PA	1.96	XP_001814148.1
	CALNUC	-4.32	AAF63957.1
	CG12340 CG12340-PA	3.37	XP_001807927.1
	CG15561 CG15561-PA	4.92	XP_972716.1
	CG6188-PA	-8.32	XP_625210.1
	CG6345 CG6345-PA	2.44	XP_973511.1
	Conserved hypothetical protein	3.27	XP_001605161.1
	Conserved hypothetical protein	-1.53	XP_001604219.1
	Conserved hypothetical protein	6.86	XP_001843982.1
	DEAD/H (Asp-Glu-Ala-Asp/His) Box polypeptide 1	3.39	XP_001949260.1
	DNA cytosine-5 methyltransferase	1.8	NP_001036934.1
	DNA polymerase delta small subunit	3.64	XP_001658442.1
	Ecto-nucleotidase	-10.42	NP_001040490.1
	Elongation factor Tu GTP binding domain containing 1	2.63	XP_001943454.1
	Exosome component 8	3.73	XP_972667.1
	Fez1	2.54	NP_001124350.1
	Fucosyltransferase 10	3.08	XP_001086212.1
	GF17115	-8.21	XP_001953668.1
	GI10501	-10.04	XP_002000915.1
	GI10501	-7.14	XP_002000915.1
	GI12053	-2.37	XP_002008039.1
	GI18953	2.51	XP_002005656.1
	helicase	2.94	XP_001664014.1
	Histone-lysine n-methyltransferase	1.88	XP_001603698.1
	Hypothetical protein	6.73	XP_001943491.1
	Hypothetical protein	2.9	XP_001946393.1
	Leucyl-tRNA synthetase, cytoplasmic	-2.21	ACN10526.1
	Ligase I	3.8	XP_001180844.1
	MBF2	2.49	BAA20370.1
	Mediator complex subunit 17 CG7957-PA	5.44	XP_394516.2
	Methionyl-tRNA formyltransferase, mitochondrial	7.27	XP_853405.1
	ORF2-encded protein, partial	-1.74	XP_001601755.1
	Ovary C/EBPg transcription factor	3.06	NP_001037102.1
	Phd finger transcription factor	2.18	XP_001647947.1
	phosphoribosylaminoimidazole carboxylase	-2.88	NP_001040376.1
	Polymerase (RNA) III DNA Directed polypeptide H	2.76	XP_394665.1
	Predicted protein, partial	7.18	XP_002167317.1
	Reverse transcriptase	2.43	ABO45231.1
	Reverse transcriptase	3.73	BAC06452.1
	Reverse transcriptase	3.43	BAE46430.1
	Ribonuclease	-4.5	ABK29484.1
	Ribonuclease	-4.41	ABK29484.1
	RNA binding motif protein 34, partial	3.57	XP_002157256.1
	RNA polymerase 1-3	-1.7	NP_001032876.1
	RNA polymerase II subunit 10	4.25	NP_001137388.1
	RrnaAD, ribosomal RNA adenine dimethylase, putative	5.37	XP_001649984.1
	Tryptophanyl-tRNA synthetase, cytoplasmic	3.43	P17248.3
	Ubiquitin-conjugating enzyme E2 g	-2.68	XP_973689.1
	Wd-repeat protein	3.85	XP_001811459.1
Stress response
	Catalase	-4.91	NP_001036912.1
	Catalase	-3.89	NP_001036912.1
	DnaJ-like protein	3.7	NP_001040115.1
	DnaJ-like protein	-2.35	NP_001040115.1
	GA21658-PA	-6.11	XP_001600050.1
	GJ24030	-2.45	XP_002053864.1
	Heat shock protein	3.73	XP_001654758.1
	Paraplegin	-2.78	XP_001813433.1
	SGT1, suppressor of G2 allele of SKP1	2.15	XP_001599865.1
	Tubulin-specific chaperone a	3.24	XP_396381.2
Virus replication/altered host physiology
	AGAP006941-PA	3.4	XP_308815.1
	AGAP007920-PA	-3.8	XP_317561.4
	Antennal-enriched UDP glucosyltransferase	-11.45	NP_001040425.1
	CG4080-PA, partial	-4.82	XP_393326.2
	CG5800 Cg5800-PA	2.5	XP_968425.1
	DEAD box ATP-dependent RNA helicase	-2.25	XP_001602245.1
	Fasciclin 3	-3.23	ABK29522.1
	f-box/Irr protein, protein	1.79	XP_001654425.1
	Gasp precursor	-4.91	NP_001040470.1
	GI12711	3.24	XP_002007038.1
	GI16780	1.65	XP_002012093.1
	GL10513	3.42	XP_002016391.1
	Glucosyl/glucosyltransferases	-2.57	XP_967762.1
	Glucosyl/glucosyltransferases	-2.18	XP_967762.1
	glucosyl/glucuronosyl transferases	-26.13	XP_001662128.1
	Hypothetical protein	-5.77	XP_001660607.1
	Hypothetical protein MdBV_sBgp1	-2.12	YP_239364.1
	LIM domain protein PLIM1	3.65	AAD56950.1
	ORF58	2.51	NP_059206.1
	Phenol UPD-glucosyltransferase	-12.85	NP_001037040.1
	Phenol UPD-glucosyltransferase	-5.69	NP_001037040.1
	Retroelement polyprotein	2.56	ACE75273.1
	ribonucleoside-diphosphate reductase large chain	2.63	XP_001660977.1
	Tetracyclin-resistance protein	-2.35	NP_690545.1
	Translation initation factor 1a	4.34	NP_001040352.1
	UDP-glucosyl transferase	4.51	ACN39598.1
